# Supplementary material for: Ferrocenyl(trihydro)borates: building blocks for the synthesis of heterooligonuclear metallocene complexes
Source: Royal Society of Chemistry journal article supplement (doi:10.1039/c2dt31732j), 2012-08-31
Supplement: c2dt31732j_2.pdf [file c2dt31732j_2.pdf]

# **Supporting Information**

**for the paper**

## **Ferrocenyl(trihydro)borates: Building Blocks for the Synthesis of Heterooligonuclear Metallocene Complexes**

**Adelina Reichert, Michael Bolte, Hans-Wolfram Lerner and Matthias Wagner**

## X-ray crystal structure analyses of compounds **2** and **5**

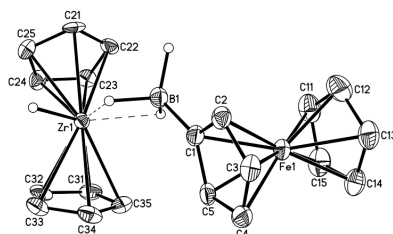

**Figure 1S:** Molecular structure of **2** in the solid state. Hydrogen atoms except on boron and zirconium have been omitted for clarity; displacement ellipsoids are drawn at the 50% probability level. Selected bond lengths (Å), atom...atom distance (Å), bond angle (°), and dihedral angles (°): B(1)–C(1) 1.593(8), Zr(1)–H(1) 1.64(5), Zr(1)···B(1) 2.588(5); B(1)···Zr(1)–H(1) 94(2); Cp(C(1))/B(1)Zr(1)H(1) 71(1), Cp(C(21))/Cp(C(31)) 48.3(2).

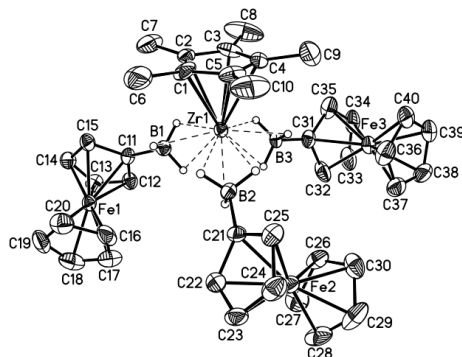

**Figure 2S:** Molecular structure of **5** in the solid state. Hydrogen atoms except on boron have been omitted for clarity; displacement ellipsoids are drawn at the 50% probability level. Selected bond lengths (Å), atom...atom distances (Å), and bond angles (°): B(1)–C(11) 1.573(12), B(2)–C(21) 1.583(10), B(3)–C(31) 1.577(9), Zr(1)···B(1) 2.380(9), Zr(1)···B(2) 2.363(7), Zr(1)···B(3) 2.384(6); B(1)···Zr(1)···B(2) 103.7(3), B(1)···Zr(1)···B(3) 103.8(3), B(2)···Zr(1)···B(3) 103.0(3).

**Table 1S:** Crystallographic Data for **2** and **5**

|                                                      | <b>2</b>                              | <b>5</b>                                                          |
|------------------------------------------------------|---------------------------------------|-------------------------------------------------------------------|
| formula                                              | C <sub>20</sub> H <sub>23</sub> BFeZr | C <sub>40</sub> H <sub>51</sub> B <sub>3</sub> Fe <sub>3</sub> Zr |
| <i>fw</i>                                            | 421.26                                | 823.01                                                            |
| colour, shape                                        | orange, needle                        | orange, needle                                                    |
| temp (K)                                             | 173(2)                                | 173(2)                                                            |
| cryst. syst.                                         | monoclinic                            | monoclinic                                                        |
| space group                                          | <i>P</i> 2 <sub>1</sub> / <i>c</i>    | <i>P</i> 2 <sub>1</sub> / <i>n</i>                                |
| <i>a</i> (Å)                                         | 7.8828(5)                             | 7.7895(7)                                                         |
| <i>b</i> (Å)                                         | 12.3274(8)                            | 23.3720(19)                                                       |
| <i>c</i> (Å)                                         | 17.7040(12)                           | 20.470(2)                                                         |
| <i>α</i> (°)                                         | 90                                    | 90                                                                |
| <i>β</i> (°)                                         | 95.903(6)                             | 90.081(8)                                                         |
| <i>γ</i> (°)                                         | 90                                    | 90                                                                |
| <i>V</i> (Å <sup>3</sup> )                           | 1711.25(19)                           | 3726.7(6)                                                         |
| <i>Z</i>                                             | 4                                     | 4                                                                 |
| <i>D</i> <sub>calcd.</sub> (g cm <sup>-3</sup> )     | 1.635                                 | 1.467                                                             |
| <i>F</i> (000)                                       | 856                                   | 1696                                                              |
| <i>μ</i> (mm <sup>-1</sup> )                         | 1.452                                 | 1.444                                                             |
| cryst. size (mm <sup>3</sup> )                       | 0.21 × 0.09 × 0.09                    | 0.27 × 0.13 × 0.12                                                |
| reflections collected                                | 14384                                 | 21865                                                             |
| indep. reflns ( <i>R</i> <sub>int</sub> )            | 3212 (0.1123)                         | 6621 (0.1558)                                                     |
| data/restraints/params                               | 3212/0/224                            | 6621/6/432                                                        |
| GOOF on <i>F</i> <sup>2</sup>                        | 0.885                                 | 0.866                                                             |
| <i>R</i> 1, <i>wR</i> 2 ( <i>I</i> > 2σ( <i>I</i> )) | 0.0419, 0.0770                        | 0.0598, 0.1134                                                    |
| <i>R</i> 1, <i>wR</i> 2 (all data)                   | 0.0775, 0.0851                        | 0.1281, 0.1328                                                    |
| Largest diff peak and hole (eÅ <sup>-3</sup> )       | 0.812 and -0.977                      | 0.752 and -0.883                                                  |
